# Supplementary material for: An Early Predictive Scoring Model for In-Hospital Cardiac Arrest of Emergent Hemodialysis Patients
Source: MDPI journal article supplement (doi:10.3390/jcm10153241), 2021-07-22
Supplement: s1 [file s1]

**Table S1.** The receiver-operating characteristic (ROC) curves for the incidence of IHCA between significant variables in each domain and predicting and validation models by comparing the area under curve (AUC) following by *p*-value, sensitivity, and specificity.

| <b>IHCA within 3 Days</b>   | <b>AUC</b> | <b><i>p</i>-Value</b> | <b>Sensitivity</b> | <b>Specificity</b> |
|-----------------------------|------------|-----------------------|--------------------|--------------------|
| pH < 7.35                   | 0.644      | 0.004                 | 0.507              | 0.727              |
| K > 5.5 mmol/L              | 0.661      | 0.001                 | 0.545              | 0.775              |
| MAP < 80 mmHg               | 0.656      | 0.002                 | 0.801              | 0.500              |
| Saturation < 85%            | 0.604      | 0.048                 | 0.789              | 0.425              |
| Model of above 4 parameters | 0.780      | <0.001                |                    |                    |
| 2019_validation model       | 0.753      | 0.023                 |                    |                    |

Selected parameters with greater area under the curve (AUC). Construction of the full model and validation in the 2019 database. Abbreviations were given as K: potassium; MAP: mean arterial pressure.

**Table S2.** Sensitivity analysis of major factors between the primary (2015–2018) and validation (2019) cohorts.

|                         | <b>Primary Database<br/>(<i>n</i> = 190)</b> | <b>Validation Database<br/>(<i>n</i> = 67)</b> | <b><i>p</i> Value</b> |
|-------------------------|----------------------------------------------|------------------------------------------------|-----------------------|
| pH < 7.35               | <i>n</i> = 178                               | <i>n</i> = 64                                  |                       |
| No                      | 83 (46.6%)                                   | 26 (40.6%)                                     | 0.408                 |
| Yes                     | 95 (53.4%)                                   | 38 (59.4%)                                     |                       |
| K > 5.5 mmol/L          | <i>n</i> = 187                               | <i>n</i> = 67                                  |                       |
| No                      | 131 (70.1%)                                  | 44 (65.7%)                                     | 0.506                 |
| Yes                     | 56 (29.9%)                                   | 23 (34.3%)                                     |                       |
| MAP < 80 mmHg           | <i>n</i> = 181                               | <i>n</i> = 66                                  |                       |
| No                      | 134 (74.0%)                                  | 47 (71.2%)                                     | 0.658                 |
| Yes                     | 47 (26.0%)                                   | 19 (28.8%)                                     |                       |
| Oxygen saturation < 85% | <i>n</i> = 168                               | <i>n</i> = 57                                  |                       |
| No                      | 119 (70.8%)                                  | 45 (78.9%)                                     | 0.234                 |
| Yes                     | 49 (29.2%)                                   | 12 (21.1%)                                     |                       |
| Prediction score system | <i>n</i> = 151                               | <i>n</i> = 55                                  |                       |
| Low-risk: Score < 3     | 115 (76.2%)                                  | 43 (78.2%)                                     | 0.751                 |
| High-risk: Score ≥ 3    | 36 (23.8%)                                   | 12 (21.8%)                                     |                       |
| Complete model          | <i>n</i> = 190                               | <i>n</i> = 67                                  |                       |
| No (missing factor)     | 39 (20.5%)                                   | 12 (17.9%)                                     | 0.644                 |
| Yes (four factors)      | 151 (79.5%)                                  | 55 (82.1%)                                     |                       |

Abbreviations were given as K: potassium; MAP: mean arterial pressure.

**Table S3.** Sensitivity analysis of major factors between the missing-data and complete-data groups.

|                         | Missing-Data Group<br>( <i>n</i> = 51) | Complete-Data Group<br>( <i>n</i> = 206) | <i>p</i> Value |
|-------------------------|----------------------------------------|------------------------------------------|----------------|
| pH < 7.35               | <i>n</i> = 36                          | <i>n</i> = 206                           |                |
| No                      | 12 (33.3%)                             | 97 (47.1%)                               | 0.126          |
| Yes                     | 24 (66.7%)                             | 109 (52.9%)                              |                |
| K > 5.5 mmol/L          | <i>n</i> = 48                          | <i>n</i> = 206                           |                |
| No                      | 28 (58.3%)                             | 147 (71.4%)                              | 0.079          |
| Yes                     | 20 (41.7%)                             | 59 (28.6%)                               |                |
| MAP < 80 mmHg           | <i>n</i> = 41                          | <i>n</i> = 206                           |                |
| No                      | 29 (70.7%)                             | 152 (73.8%)                              | 0.686          |
| Yes                     | 12 (29.3%)                             | 54 (28.2%)                               |                |
| Oxygen saturation < 85% | <i>n</i> = 19                          | <i>n</i> = 206                           |                |
| No                      | 15 (78.9%)                             | 149 (72.3%)                              | 0.535          |
| Yes                     | 4 (21.1%)                              | 57 (27.7%)                               |                |
| Prediction score system | <i>n</i> = 51                          | <i>n</i> = 206                           |                |
| Low-risk: Score < 3     | Not applicable                         | 158 (76.7%)                              |                |
| High-risk: Score ≥ 3    | Not applicable                         | 48 (23.3%)                               |                |

Abbreviations were given as K: potassium; MAP: mean arterial pressure.
